# Supplementary material
Source: publisher figshare collection journal article supplement (https://tandf.figshare.com/ndownloader/files/18664049)
Supplement: Supplementary file 1 [file 18664049]

SUPPLEMENTARY INFORMATION

ADSORPTION OF ALKYLTRIMETHYLAMMONIUM BROMIDES ON NANODIAMONDS

Gennadii A. Badun, Maria G. Chernysheva, Anton V. Gus’kov, Artem V. Sinolits, Andrey G. Popov, Alexander V. Egorov., Tolganay B. Egorova, Inna I. Kulakova, Georgii V. Lisichkin

Typical dynamic light scattering results for nanodiamonds modified with cationic surfactants (DTAB). Distribution by number. For TTAB and CTAB the results were similar. Legend shows the surface concentration of DTAB.
